# Supplementary material for: Brg1 Loss Attenuates Aberrant Wnt-Signalling and Prevents Wnt-Dependent Tumourigenesis in the Murine Small Intestine
Source: PLoS Genet. 2014 Jul 10;10(7):e1004453. doi: 10.1371/journal.pgen.1004453 (PMC4091792; doi:10.1371/journal.pgen.1004453)
Supplement: Table S13 — Stem cell signature genes differentially expressed between VillinCre+Apcfl/flBrgfl/fl and VillinCre+Apcfl/fl small intestinal epithelium. (XLS) [file pgen.1004453.s015.xls]

## Sheet: S13
Stem cell signature genes differentially expressed between VillinCre+Apcfl/flBrgfl/fl and VillinCre+Apcfl/fl small intestinal epithelium.
ID	EntrezID	Symbol	logFC	adj.P.Val
ILMN_3161834	380924	Olfm4	-4.8834	6.12615e-05
ILMN_2598103	13731	Emp2	-3.79501	0.000444925
ILMN_2640330	12505	Cd44	-3.13913	0.000166105
ILMN_1221835	73710	Tubb2b	-3.0247	2.43802e-06
ILMN_2593774	66214	Rgcc	-2.96002	0.000211506
ILMN_1232667	80876	Ifitm2	-2.86047	0.00258549
ILMN_1377919	73710	Tubb2b	-2.59499	9.05695e-05
ILMN_2754990	12505	Cd44	-2.4969	0.012056
ILMN_2891583	76459	Car12	-2.43655	0.00388525
ILMN_2751494	53416	Stk39	-2.15059	0.000850337
ILMN_2851040	17215	Mcm3	-2.08966	0.0400603
ILMN_2686244	213391	Rassf4	-2.07528	0.0238387
ILMN_2623526	17869	Myc	-2.04144	0.0429099
ILMN_2667635	209195	Clic6	-2.01864	0.0304644
ILMN_2790181	236539	Phgdh	-1.98044	0.0420407
ILMN_2733733	24088	Tlr2	-1.96372	0.00107686
ILMN_2825574	73710	Tubb2b	-1.87864	0.00020474
ILMN_2650008	14160	Lgr5	-1.86025	0.0115074
ILMN_2926155	56190	Rbm38	-1.77337	0.000258695
ILMN_1240979	56190	Rbm38	-1.77321	0.00219389
ILMN_2712792	27373	Csnk1e	-1.76803	0.0487508
ILMN_2737710	21844	Tiam1	-1.74918	0.0322109
ILMN_2922334	207521	Dtx4	-1.72343	0.0229603
ILMN_2918907	328949	Mcc	-1.65903	0.0499158
ILMN_1218441	22626	Slc23a3	-1.64741	0.0176881
ILMN_2651706	207521	Dtx4	-1.62538	0.0112963
ILMN_2691352	13639	Efna4	-1.52431	0.00260149
