# Supplementary material for: Brg1 Loss Attenuates Aberrant Wnt-Signalling and Prevents Wnt-Dependent Tumourigenesis in the Murine Small Intestine
Source: PLoS Genet. 2014 Jul 10;10(7):e1004453. doi: 10.1371/journal.pgen.1004453 (PMC4091792; doi:10.1371/journal.pgen.1004453)
Supplement: Table S14 — Primers used for qRT-PCR analysis. (XLS) [file pgen.1004453.s016.xls]

## Sheet: S14
qRT-PCR primers
Gene	Forward Primer	Reverse Primer
b-catenin	AGTCCTTTATGAATGGGAGCAA	TCTGAGCCCTAGTCATTGCATA
b-actin	TGTTACCAACTGGGACGACA	GGGGTGTTGAAGGTCTCAAA
CD44	ATCGCGGTCAATAGTAGGAGAA	AAATGCACCATTTCCTGAGACT
c-myc	CTAGTGCTGCATGAGGAGACAC	GTAGTTGTGCTGGTGAGTGGAG
Cyclin D1	ACGATTTCATCGAACACTTCCT	GGTCACACTTGATGACTCTGGA
Axin2	GCAGCTCAGCAAAAAGGGAAAT	TACATGGGGAGCACTGTCTCGT
